# Supplementary material for: DBU-mediated [4 + 2] annulations of donor–acceptor cyclopropanes with 3-aryl-2-cyanoacrylates for the synthesis of fully substituted anilines
Source: Royal Society of Chemistry journal article supplement (doi:10.1039/c7ra07230a), 2017-01-01
Supplement: c7ra07230a1.pdf [file c7ra07230a1.pdf]

*Electronic Supplementary Information*

**DBU-mediated [4 + 2] Annulations of Donor-Acceptor Cyclopropanes with 3-Aryl-2-cyanoacrylates for Synthesis of Fully Substituted Anilines**

Jiaming Liu, Siran Qian, Zhenjie Su and Cunde Wang\*

*School of Chemistry and Chemical Engineering, Yangzhou University, 180 Siwangting Street, Yangzhou 225002, P. R. China. Fax: +86-514-8797-5244; Tel: +86-514-8797-5568; E-mail: [wangcd@yzu.edu.cn](mailto:wangcd@yzu.edu.cn)*

**CONTENTS**

1. Copies of NMR Spectroscopies of fully substituted anilines **3a-x**.....S2
2. X-ray Structure of fully substituted anilines **3b,3i**.....S26





4'-amino-6'-(4-bromobenzoyl)-4''-methoxy-3-methyl-[1,1':2',1''-terphenyl]-3',5'-dicarbonitrile (**3c**)

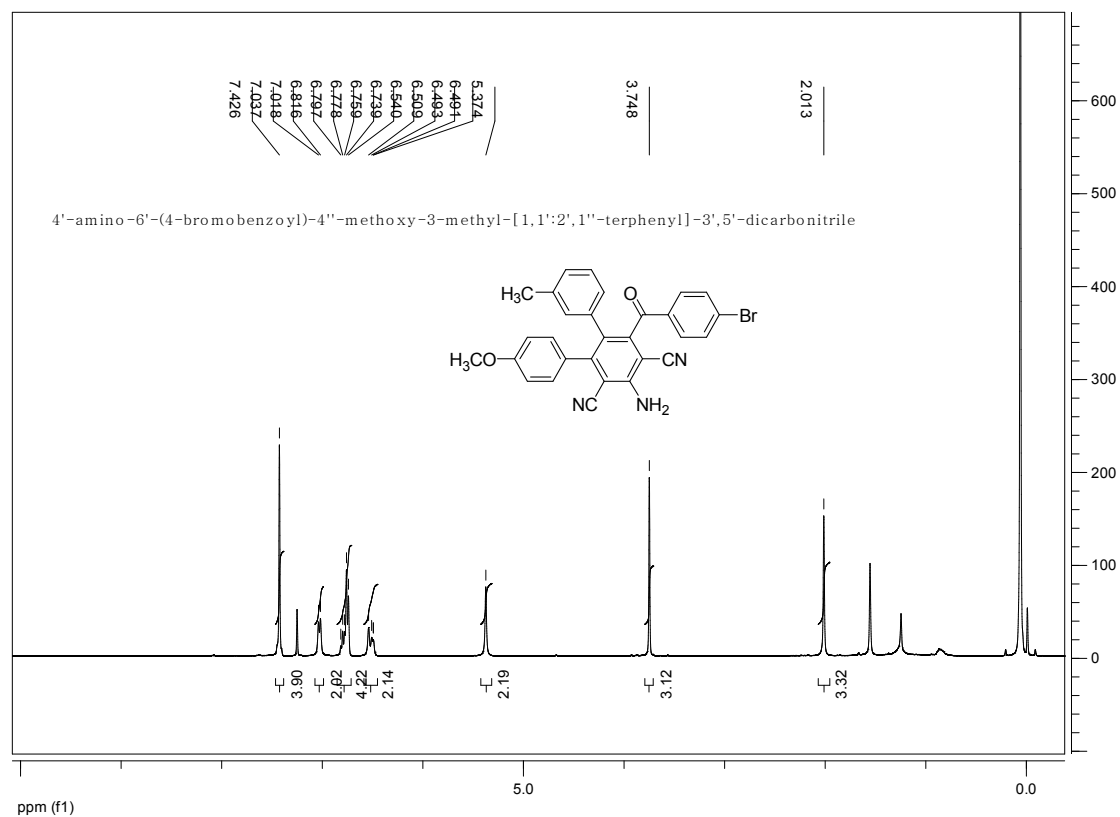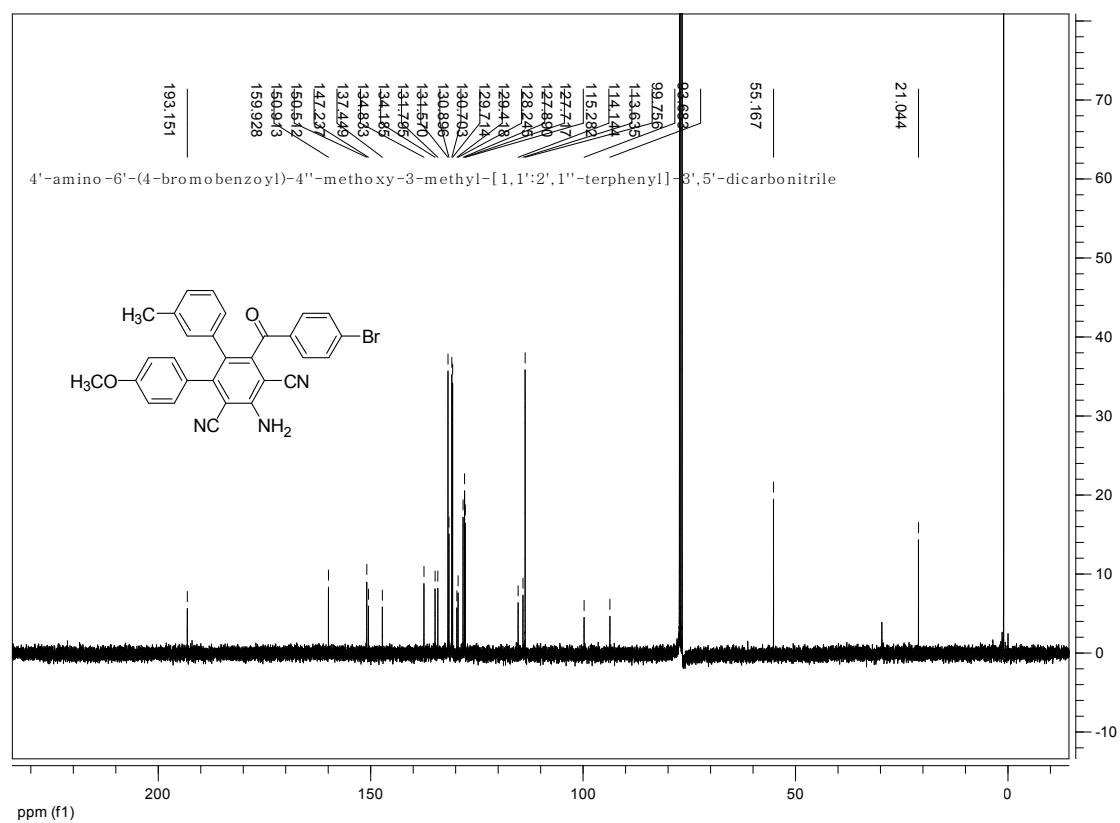





4'-amino-4''-bromo-6'-(4-bromobenzoyl)-3-methyl-[1,1':2',1''-terphenyl]-3',5'-dicarbonitrile(3e)

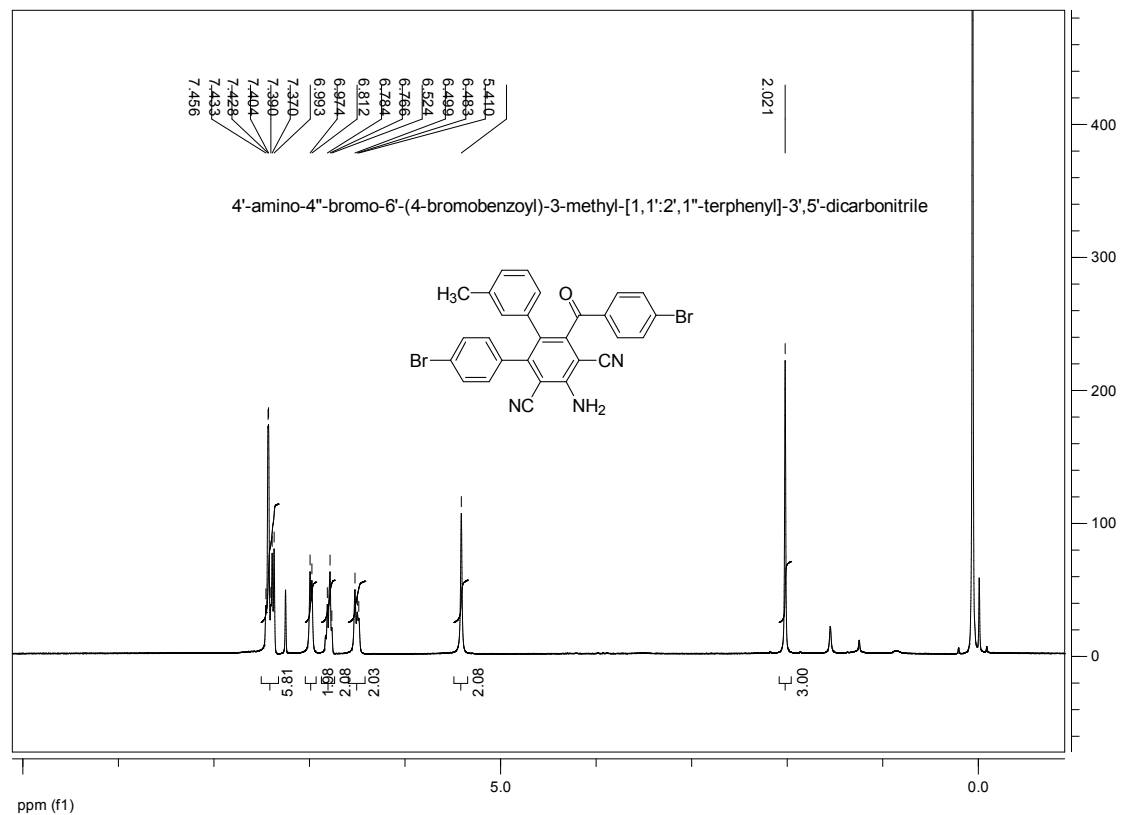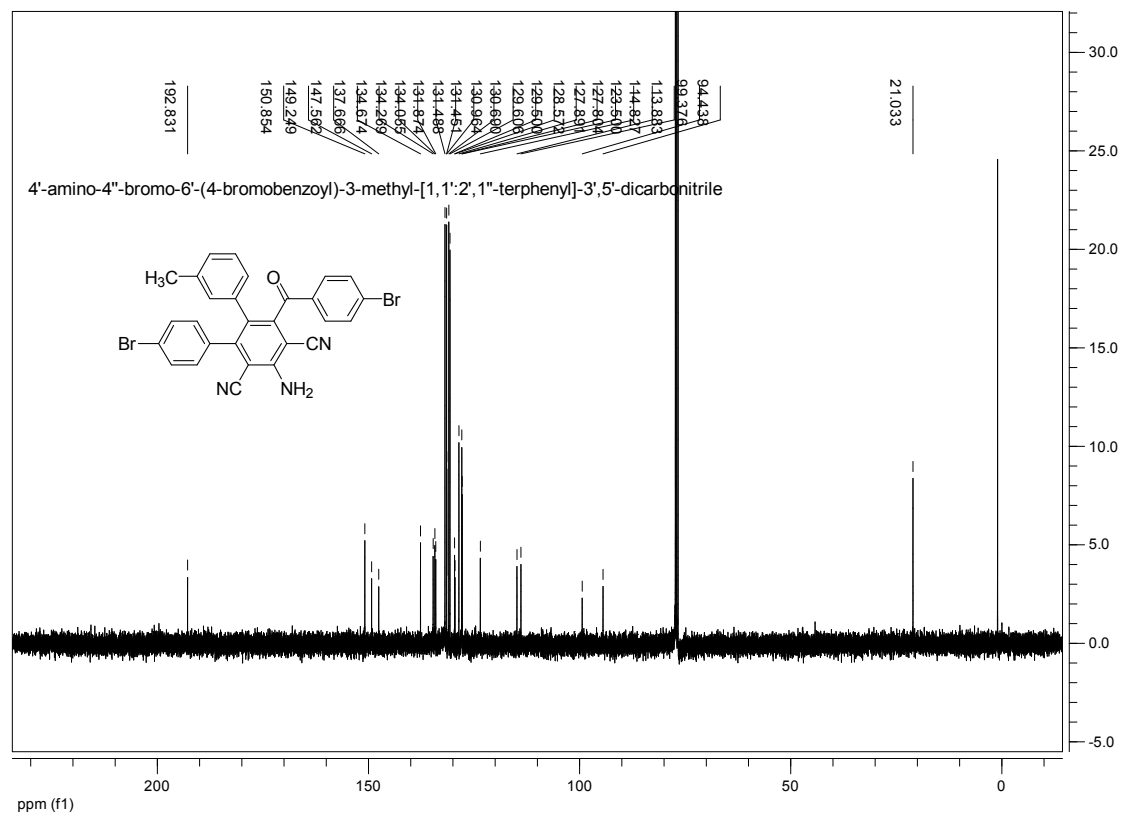

4'-amino-6'-(4-bromobenzoyl)-2'',3-dimethyl-[1,1':2',1''-terphenyl]-3',5'-dicarbonitrile

(3f)

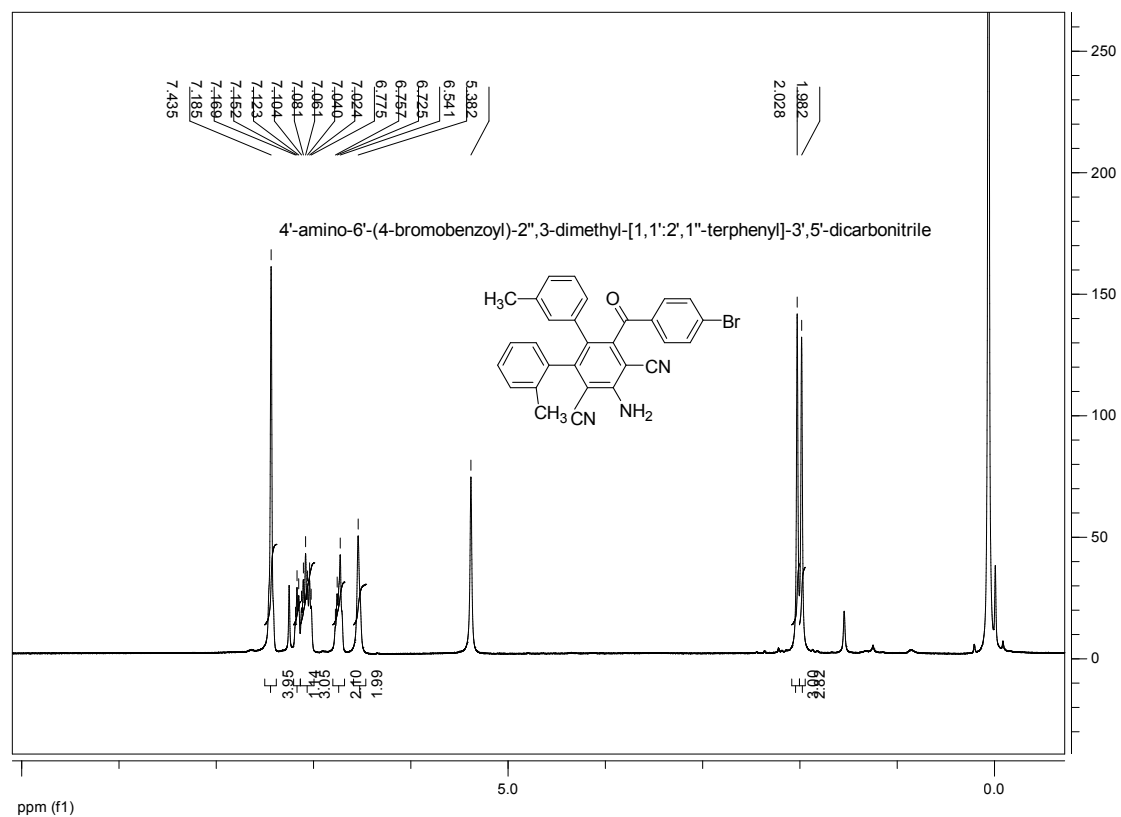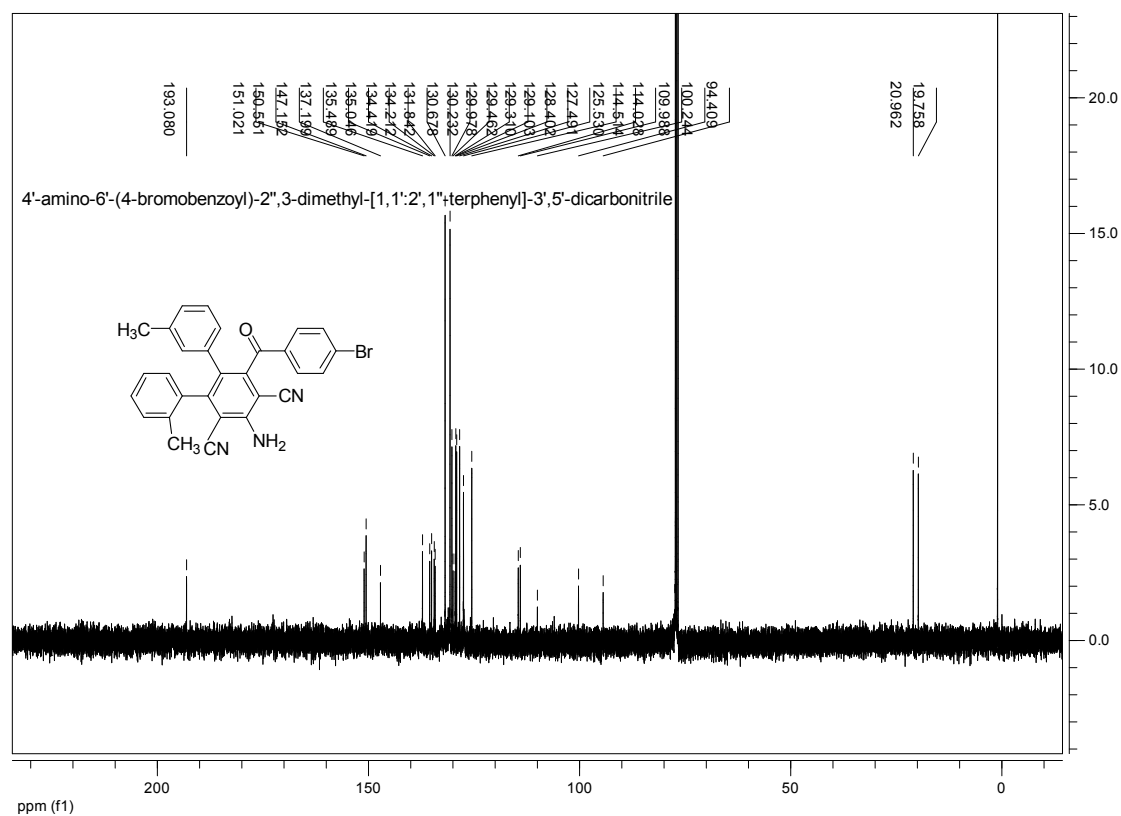

4'-amino-6'-benzoyl-4-chloro-3''-methyl-[1,1':2',1''-terphenyl]-3',5'-dicarbonitrile(**3g**)

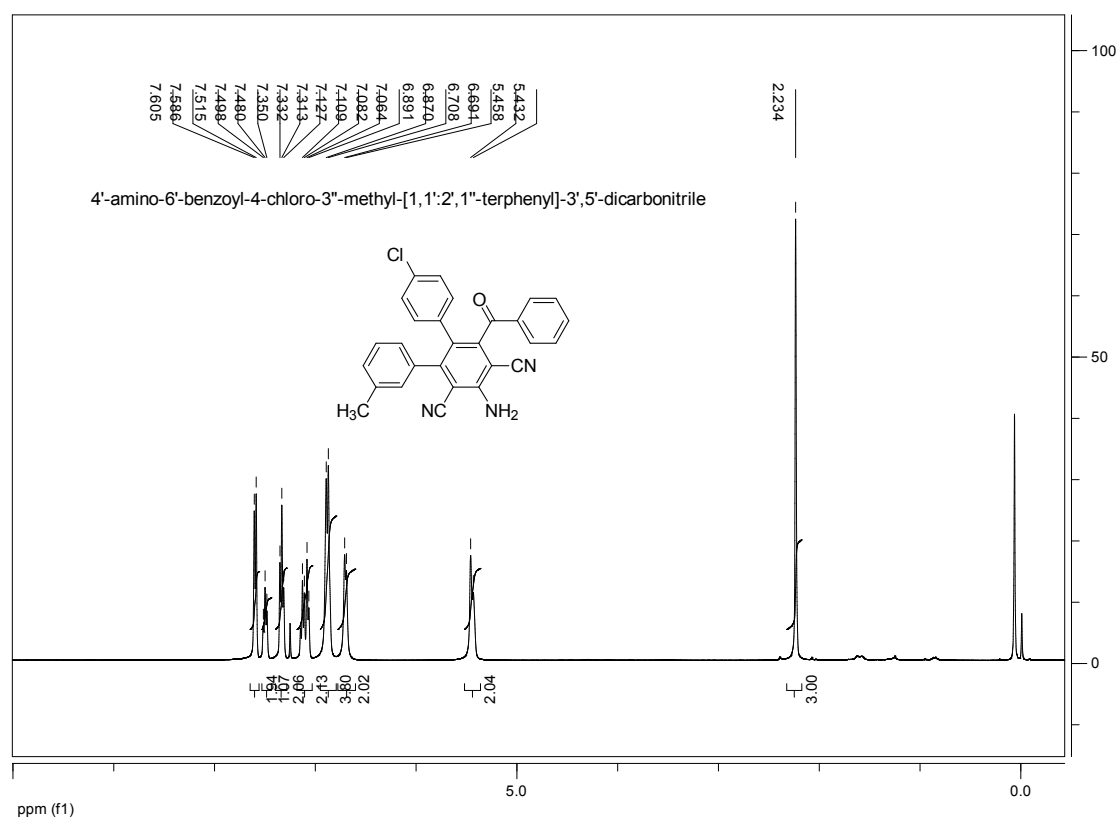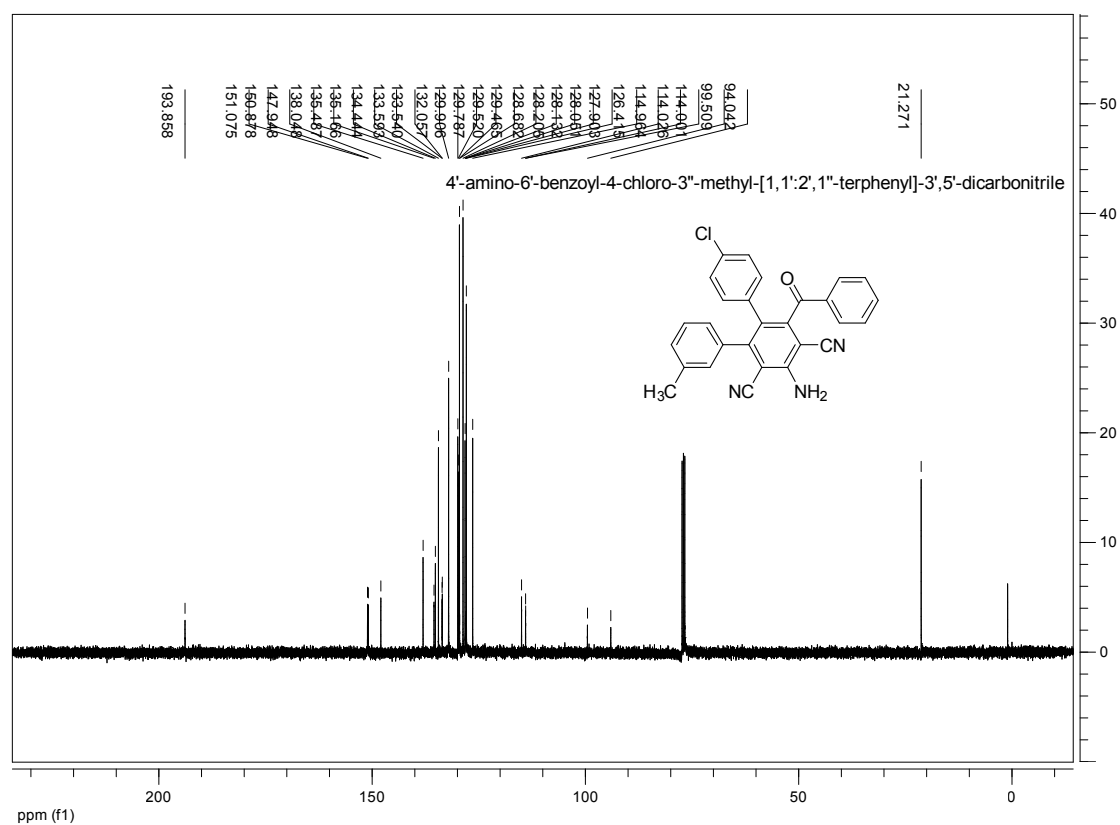





4'-amino-6'-(4-bromobenzoyl)-4''-chloro-4-methoxy-[1,1':2',1''-terphenyl]-3',5'-dicarbonitrile(3j)

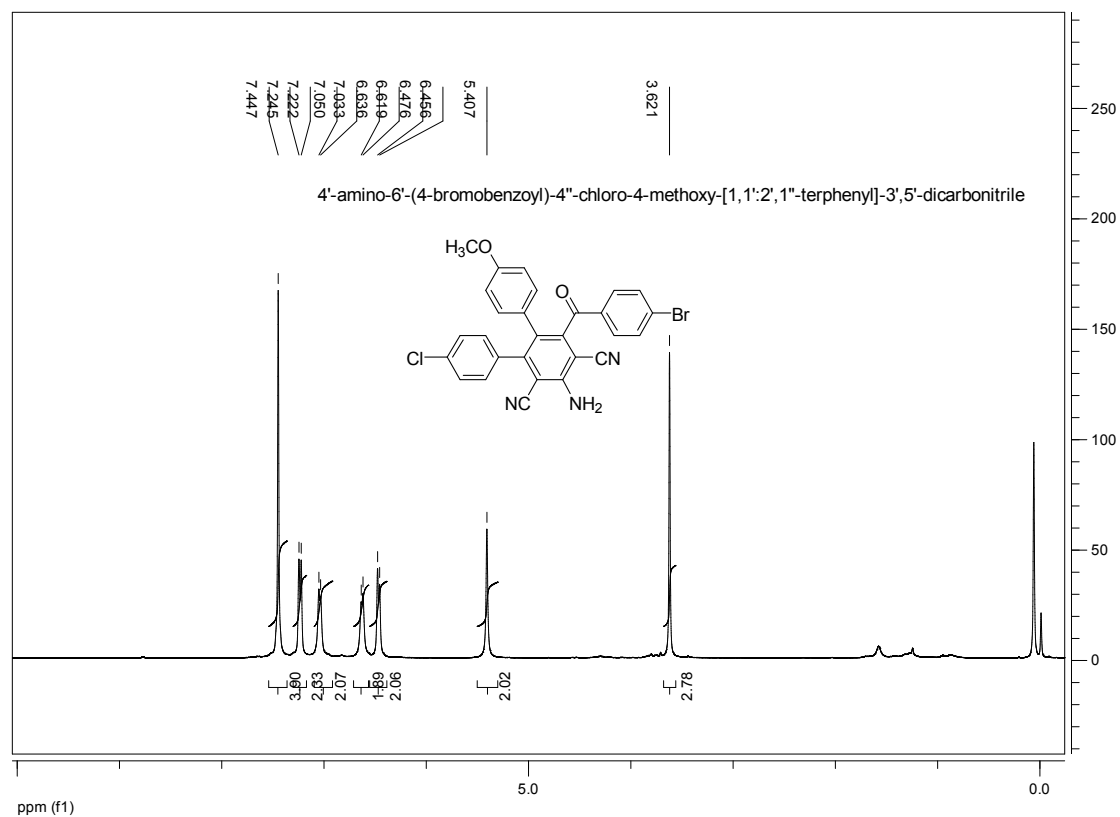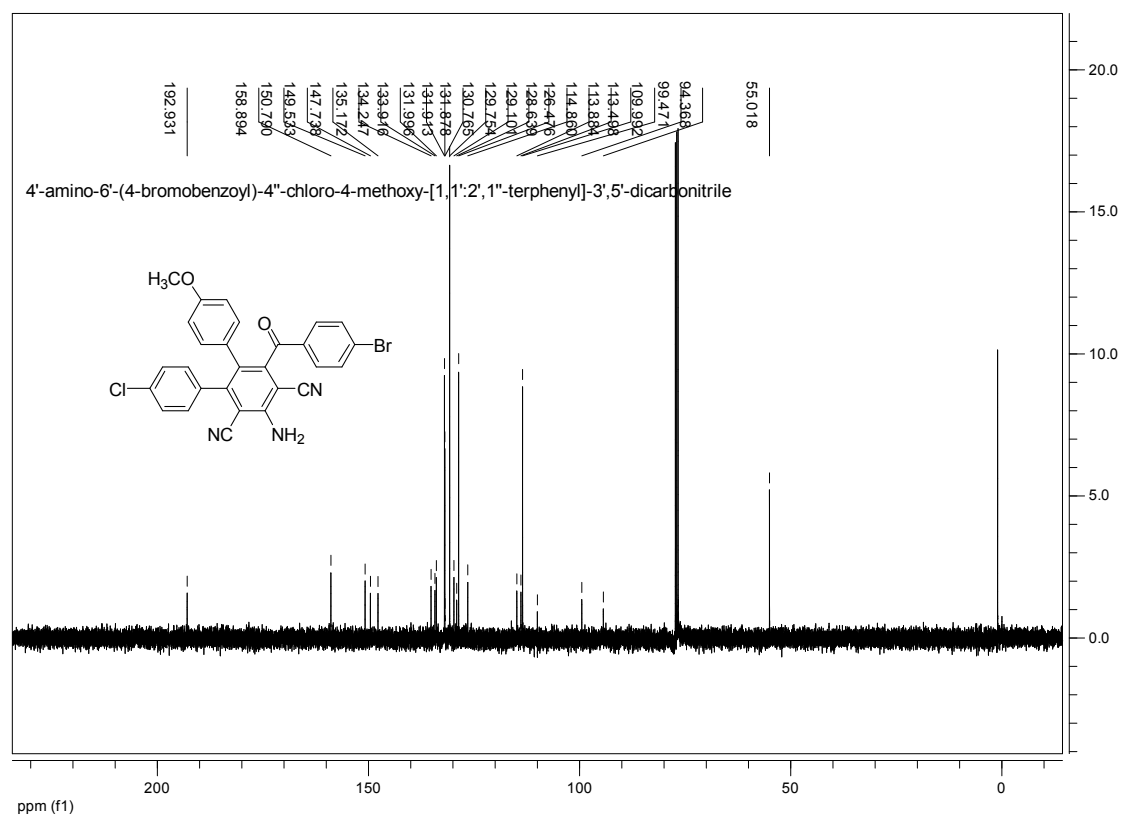













4'-amino-6'-benzoyl-3''-chloro-3-methyl-[1,1':2',1''-terphenyl]-3',5'-dicarbonitrile (**3p**)

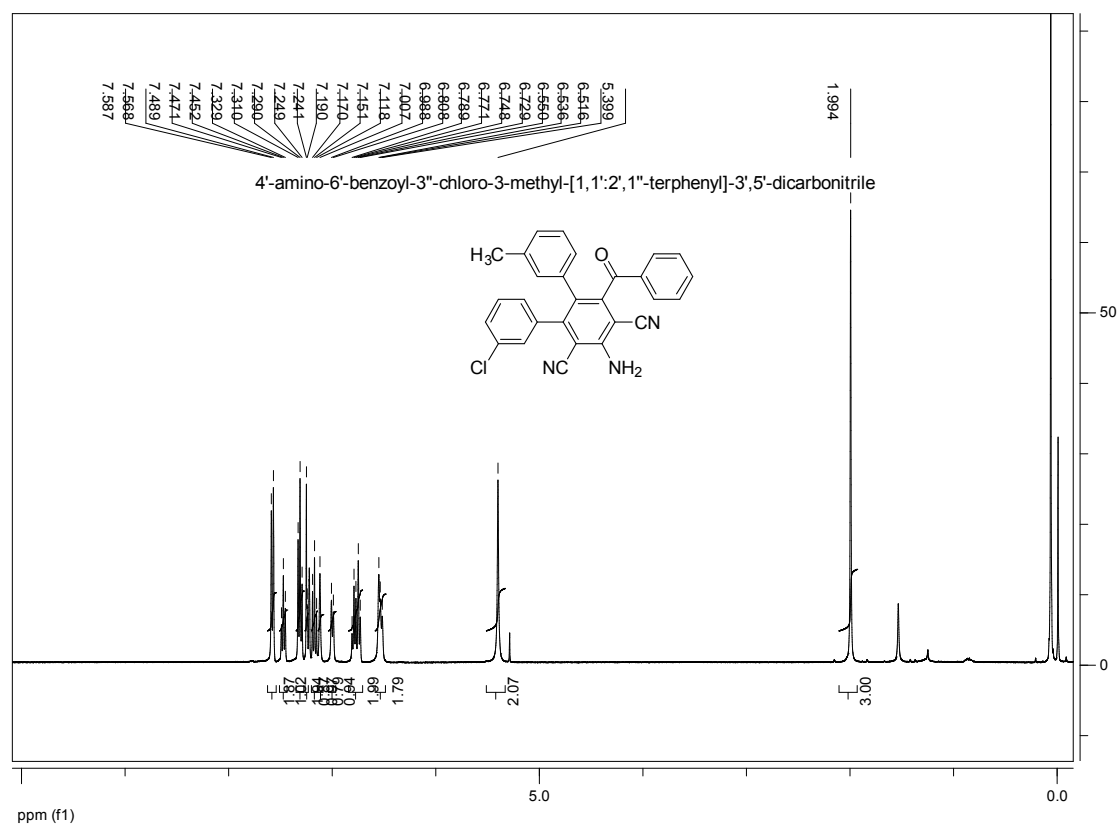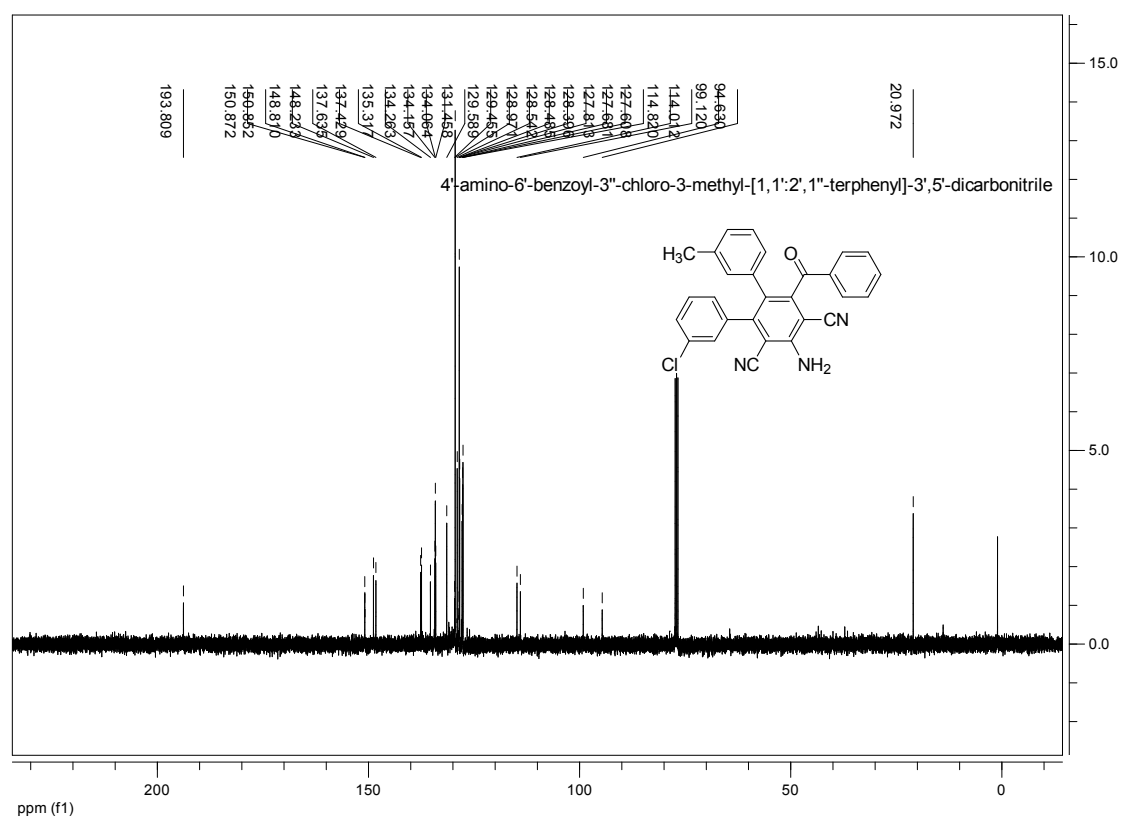

















dicarbonitrile (**3x**)

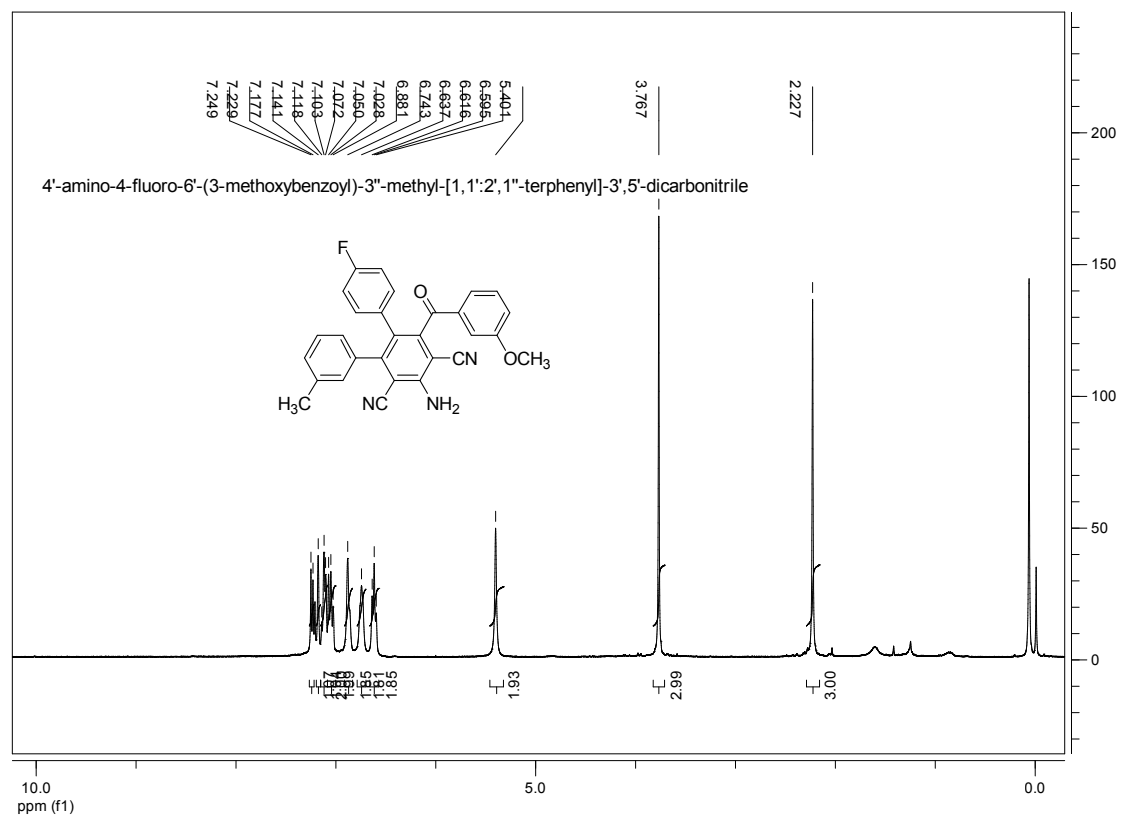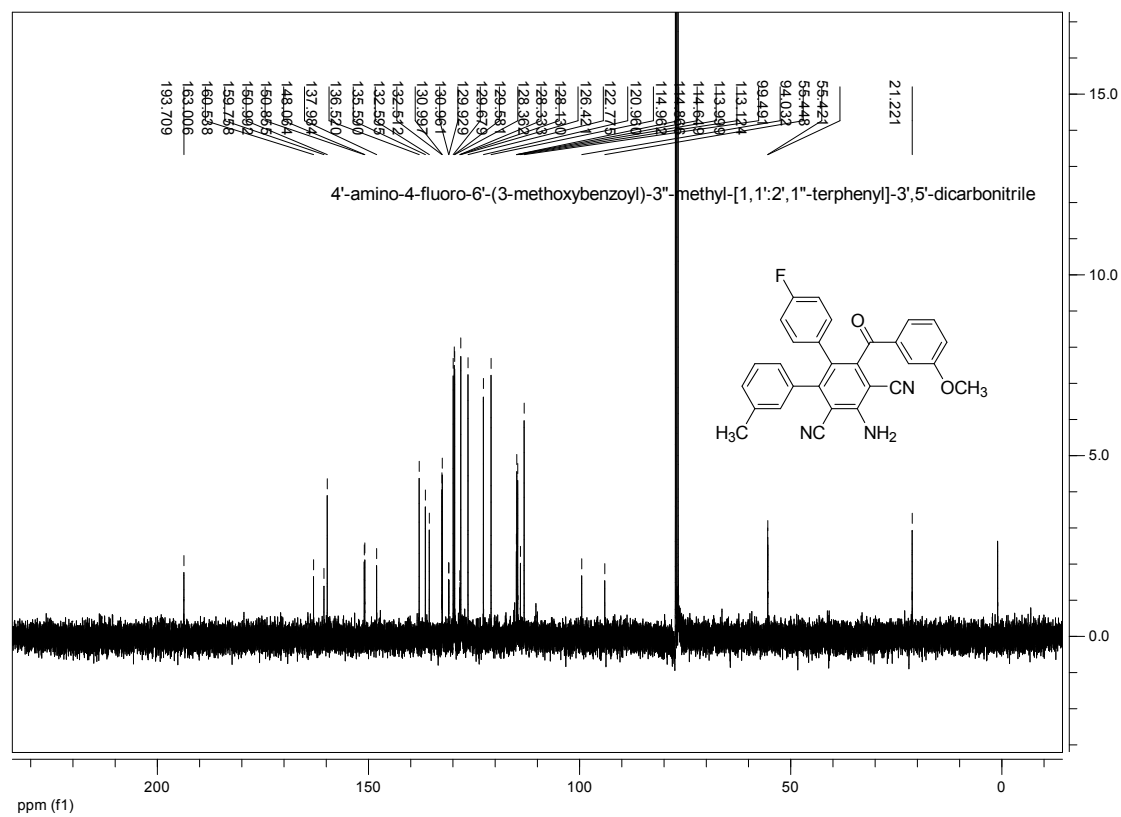

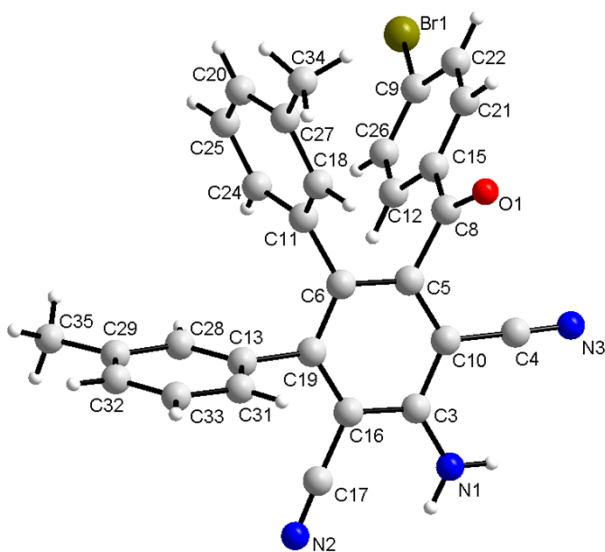

Table S1. Crystal data and structure refinement for **3b**.

|                             |                                                                                                                         |
|-----------------------------|-------------------------------------------------------------------------------------------------------------------------|
| Identification code         | <b>3b</b>                                                                                                               |
| Empirical formula           | C <sub>29</sub> H <sub>20</sub> BrN <sub>3</sub> O                                                                      |
| Formula weight              | 506.38                                                                                                                  |
| Temperature                 | 296 K                                                                                                                   |
| Wavelength                  | 0.71073 Å                                                                                                               |
| Crystal system, space group | Monoclinic, P2(1)/c                                                                                                     |
| Unit cell dimensions        | a = 8.6727(5) Å    alpha = 90 deg.<br>b = 21.9456(14) Å    beta = 94.984(2) deg.<br>c = 12.5567(7) Å    gamma = 90 deg. |
| Volume                      | 2380.9(2) Å <sup>3</sup>                                                                                                |
| Z, Calculated density       | 4, 1.413 Mg/m <sup>3</sup>                                                                                              |
| Absorption coefficient      | 1.754 mm <sup>-1</sup>                                                                                                  |
| F(000)                      | 1032                                                                                                                    |
| Crystal size                | 0.35 x 0.33 x 0.3 mm                                                                                                    |

|                                   |                                                                    |
|-----------------------------------|--------------------------------------------------------------------|
| Theta range for data collection   | 1.87 to 25.00 deg.                                                 |
| Limiting indices                  | $-10 \leq h \leq 10$ , $-26 \leq k \leq 21$ , $-14 \leq l \leq 14$ |
| Reflections collected / unique    | 20655 / 4198 [R(int) = 0.0391]                                     |
| Completeness to theta = 25.00     | 99.7 %                                                             |
| Refinement method                 | Full-matrix least-squares on F <sup>2</sup>                        |
| Data / restraints / parameters    | 4185 / 0 / 309                                                     |
| Goodness-of-fit on F <sup>2</sup> | 1.033                                                              |
| Final R indices [I > 2sigma(I)]   | R1 = 0.0549, wR2 = 0.1431                                          |
| R indices (all data)              | R1 = 0.0838, wR2 = 0.1590                                          |
| Largest diff. peak and hole       | 1.135 and -0.490 e.A <sup>-3</sup>                                 |

Table S2. Atomic coordinates ( $\times 10^4$ ) and equivalent isotropic displacement parameters ( $\text{\AA}^2 \times 10^3$ ) for **3b**.

U(eq) is defined as one third of the trace of the orthogonalized  $U_{ij}$  tensor.

|       | x        | y       | z        | U(eq) |
|-------|----------|---------|----------|-------|
| Br(1) | 900(1)   | 2688(1) | -2569(1) | 76(1) |
| O(1)  | 5726(4)  | 4431(2) | 793(2)   | 66(1) |
| C(3)  | 6099(5)  | 3137(2) | 3528(3)  | 49(1) |
| C(4)  | 7097(5)  | 3157(2) | 1756(3)  | 49(1) |
| C(5)  | 4871(4)  | 3780(2) | 2109(3)  | 43(1) |
| C(6)  | 3764(4)  | 3997(2) | 2764(3)  | 47(1) |
| N(1)  | 7164(5)  | 2717(2) | 3878(3)  | 69(1) |
| C(8)  | 4882(5)  | 4013(2) | 973(3)   | 47(1) |
| C(9)  | 2135(5)  | 3098(2) | -1472(3) | 54(1) |
| C(10) | 6003(4)  | 3364(2) | 2474(3)  | 44(1) |
| C(11) | 2540(5)  | 4426(2) | 2308(3)  | 53(1) |
| C(12) | 3052(6)  | 3183(2) | 352(3)   | 61(1) |
| C(13) | 2861(6)  | 4059(2) | 4624(4)  | 59(1) |
| N(3)  | 7960(5)  | 3000(2) | 1176(3)  | 63(1) |
| C(15) | 3895(4)  | 3701(2) | 130(3)   | 43(1) |
| C(16) | 5030(5)  | 3389(2) | 4204(3)  | 51(1) |
| C(17) | 5151(6)  | 3205(2) | 5309(4)  | 60(1) |
| C(18) | 2855(5)  | 5034(2) | 2198(3)  | 59(1) |
| C(19) | 3888(5)  | 3806(2) | 3836(3)  | 50(1) |
| C(20) | 315(6)   | 5185(3) | 1340(4)  | 71(1) |
| C(21) | 3825(5)  | 3908(2) | -916(3)  | 57(1) |
| C(22) | 2955(5)  | 3605(2) | -1714(3) | 62(1) |
| N(2)  | 5282(6)  | 3058(2) | 6181(3)  | 80(1) |
| C(24) | 1092(5)  | 4207(2) | 1923(4)  | 64(1) |
| C(25) | -19(6)   | 4589(3) | 1446(4)  | 76(2) |
| C(26) | 2164(6)  | 2884(2) | -453(4)  | 67(1) |
| C(27) | 1708(7)  | 5431(2) | 1699(4)  | 68(1) |
| C(28) | 1323(6)  | 3891(2) | 4601(4)  | 71(1) |
| C(29) | 392(6)   | 4146(3) | 5359(5)  | 82(2) |
| C(31) | 3445(7)  | 4467(2) | 5384(4)  | 76(2) |
| C(32) | 1010(10) | 4564(3) | 6079(5)  | 96(2) |



|       |          |         |         |        |
|-------|----------|---------|---------|--------|
| C(33) | 2509(9)  | 4727(3) | 6114(5) | 94(2)  |
| C(34) | 2070(8)  | 6087(3) | 1559(6) | 100(2) |
| C(35) | -1197(8) | 3975(4) | 5372(6) | 126(3) |

---

Table S3. Bond lengths [Å] and angles [deg] for **3b**.

---

|                 |          |
|-----------------|----------|
| Br(1)-C(9)      | 1.896(4) |
| O(1)-C(8)       | 1.206(5) |
| C(3)-N(1)       | 1.351(5) |
| C(3)-C(10)      | 1.410(5) |
| C(3)-C(16)      | 1.422(6) |
| C(4)-N(3)       | 1.141(5) |
| C(4)-C(10)      | 1.438(6) |
| C(5)-C(10)      | 1.389(5) |
| C(5)-C(6)       | 1.400(5) |
| C(5)-C(8)       | 1.517(5) |
| C(6)-C(19)      | 1.406(6) |
| C(6)-C(11)      | 1.497(6) |
| C(8)-C(15)      | 1.471(6) |
| C(9)-C(26)      | 1.362(6) |
| C(9)-C(22)      | 1.369(6) |
| C(11)-C(18)     | 1.371(6) |
| C(11)-C(24)     | 1.392(6) |
| C(12)-C(26)     | 1.382(6) |
| C(12)-C(15)     | 1.392(6) |
| C(13)-C(31)     | 1.373(7) |
| C(13)-C(28)     | 1.382(7) |
| C(13)-C(19)     | 1.495(6) |
| C(15)-C(21)     | 1.386(5) |
| C(16)-C(19)     | 1.397(6) |
| C(16)-C(17)     | 1.440(6) |
| C(17)-N(2)      | 1.137(6) |
| C(18)-C(27)     | 1.427(7) |
| C(20)-C(25)     | 1.348(8) |
| C(20)-C(27)     | 1.365(8) |
| C(21)-C(22)     | 1.373(6) |
| C(24)-C(25)     | 1.375(7) |
| C(27)-C(34)     | 1.486(7) |
| C(28)-C(29)     | 1.416(7) |
| C(29)-C(32)     | 1.364(9) |
| C(29)-C(35)     | 1.430(8) |
| C(31)-C(33)     | 1.398(7) |
| C(32)-C(33)     | 1.346(9) |
| <br>            |          |
| N(1)-C(3)-C(10) | 122.0(4) |

|                   |          |
|-------------------|----------|
| N(1)-C(3)-C(16)   | 122.2(4) |
| C(10)-C(3)-C(16)  | 115.8(4) |
| N(3)-C(4)-C(10)   | 178.9(5) |
| C(10)-C(5)-C(6)   | 122.0(3) |
| C(10)-C(5)-C(8)   | 118.0(3) |
| C(6)-C(5)-C(8)    | 119.9(3) |
| C(5)-C(6)-C(19)   | 117.5(4) |
| C(5)-C(6)-C(11)   | 119.3(3) |
| C(19)-C(6)-C(11)  | 123.2(3) |
| O(1)-C(8)-C(15)   | 122.9(4) |
| O(1)-C(8)-C(5)    | 119.1(4) |
| C(15)-C(8)-C(5)   | 117.9(4) |
| C(26)-C(9)-C(22)  | 121.4(4) |
| C(26)-C(9)-Br(1)  | 118.8(4) |
| C(22)-C(9)-Br(1)  | 119.7(3) |
| C(5)-C(10)-C(3)   | 121.6(3) |
| C(5)-C(10)-C(4)   | 119.2(3) |
| C(3)-C(10)-C(4)   | 119.2(4) |
| C(18)-C(11)-C(24) | 118.9(4) |
| C(18)-C(11)-C(6)  | 120.7(4) |
| C(24)-C(11)-C(6)  | 120.2(4) |
| C(26)-C(12)-C(15) | 120.7(4) |
| C(31)-C(13)-C(28) | 119.1(4) |
| C(31)-C(13)-C(19) | 119.8(5) |
| C(28)-C(13)-C(19) | 121.1(5) |
| C(21)-C(15)-C(12) | 118.4(4) |
| C(21)-C(15)-C(8)  | 120.3(4) |
| C(12)-C(15)-C(8)  | 121.3(4) |
| C(19)-C(16)-C(3)  | 122.5(4) |
| C(19)-C(16)-C(17) | 119.5(4) |
| C(3)-C(16)-C(17)  | 118.0(4) |
| N(2)-C(17)-C(16)  | 178.4(5) |
| C(11)-C(18)-C(27) | 120.1(5) |
| C(16)-C(19)-C(6)  | 120.3(4) |
| C(16)-C(19)-C(13) | 118.1(4) |
| C(6)-C(19)-C(13)  | 121.5(4) |
| C(25)-C(20)-C(27) | 122.9(5) |
| C(22)-C(21)-C(15) | 120.6(4) |
| C(9)-C(22)-C(21)  | 119.7(4) |
| C(25)-C(24)-C(11) | 121.1(5) |
| C(20)-C(25)-C(24) | 119.1(5) |
| C(9)-C(26)-C(12)  | 119.1(4) |
| C(20)-C(27)-C(18) | 117.8(5) |
| C(20)-C(27)-C(34) | 122.4(5) |

|                   |          |
|-------------------|----------|
| C(18)-C(27)-C(34) | 119.8(5) |
| C(13)-C(28)-C(29) | 119.1(6) |
| C(32)-C(29)-C(28) | 119.9(6) |
| C(32)-C(29)-C(35) | 119.5(6) |
| C(28)-C(29)-C(35) | 120.6(7) |
| C(13)-C(31)-C(33) | 121.4(6) |
| C(33)-C(32)-C(29) | 121.5(6) |
| C(32)-C(33)-C(31) | 119.0(7) |

---

Symmetry transformations used to generate equivalent atoms:

Table S4. Anisotropic displacement parameters ( $\text{\AA}^2 \times 10^3$ ) for **3b**.

The anisotropic displacement factor exponent takes the form:

$$-2 \pi^2 [ h^2 a^{*2} U_{11} + \dots + 2 h k a^* b^* U_{12} ]$$

|       | U11    | U22    | U33   | U23    | U13   | U12    |
|-------|--------|--------|-------|--------|-------|--------|
| Br(1) | 82(1)  | 85(1)  | 61(1) | -20(1) | -5(1) | 2(1)   |
| O(1)  | 77(2)  | 64(2)  | 58(2) | 12(2)  | 5(2)  | -17(2) |
| C(3)  | 56(3)  | 45(2)  | 45(2) | 1(2)   | 4(2)  | 4(2)   |
| C(4)  | 53(3)  | 47(2)  | 45(2) | 4(2)   | 0(2)  | 3(2)   |
| C(5)  | 50(2)  | 42(2)  | 38(2) | 0(2)   | 7(2)  | -1(2)  |
| C(6)  | 48(2)  | 48(2)  | 45(2) | 6(2)   | 10(2) | 7(2)   |
| N(1)  | 86(3)  | 70(3)  | 51(2) | 13(2)  | 12(2) | 35(2)  |
| C(8)  | 49(2)  | 44(2)  | 48(2) | 5(2)   | 11(2) | 6(2)   |
| C(9)  | 57(3)  | 60(3)  | 44(2) | -5(2)  | 5(2)  | 6(2)   |
| C(10) | 49(2)  | 44(2)  | 39(2) | -1(2)  | 9(2)  | 1(2)   |
| C(11) | 64(3)  | 55(3)  | 42(2) | 5(2)   | 18(2) | 13(2)  |
| C(12) | 84(3)  | 60(3)  | 41(2) | 7(2)   | 8(2)  | -13(2) |
| C(13) | 74(3)  | 53(3)  | 53(3) | 19(2)  | 25(2) | 18(2)  |
| N(3)  | 65(2)  | 72(3)  | 55(2) | -1(2)  | 16(2) | 16(2)  |
| C(15) | 45(2)  | 44(2)  | 43(2) | 3(2)   | 11(2) | 7(2)   |
| C(16) | 63(3)  | 50(2)  | 39(2) | 7(2)   | 10(2) | 5(2)   |
| C(17) | 76(3)  | 56(3)  | 49(3) | 8(2)   | 16(2) | 17(2)  |
| C(18) | 64(3)  | 61(3)  | 53(3) | 5(2)   | 17(2) | 12(2)  |
| C(19) | 57(3)  | 47(2)  | 46(2) | 3(2)   | 14(2) | 8(2)   |
| C(20) | 67(3)  | 99(4)  | 49(3) | 5(3)   | 12(2) | 29(3)  |
| C(21) | 60(3)  | 60(3)  | 50(3) | 14(2)  | 10(2) | 0(2)   |
| C(22) | 70(3)  | 78(3)  | 38(2) | 11(2)  | 2(2)  | 3(3)   |
| N(2)  | 110(4) | 81(3)  | 50(3) | 15(2)  | 19(2) | 28(3)  |
| C(24) | 61(3)  | 77(3)  | 55(3) | 5(2)   | 7(2)  | 14(3)  |
| C(25) | 71(3)  | 101(5) | 55(3) | -4(3)  | 2(2)  | 11(3)  |
| C(26) | 85(4)  | 60(3)  | 57(3) | 0(2)   | 9(2)  | -19(3) |
| C(27) | 94(4)  | 57(3)  | 58(3) | 14(2)  | 34(3) | 20(3)  |
| C(28) | 78(3)  | 78(3)  | 58(3) | 21(3)  | 19(3) | 24(3)  |
| C(29) | 65(3)  | 105(5) | 81(4) | 46(4)  | 39(3) | 37(3)  |
| C(31) | 114(4) | 55(3)  | 63(3) | 5(2)   | 40(3) | 7(3)   |

|       |        |        |        |       |       |       |
|-------|--------|--------|--------|-------|-------|-------|
| C(32) | 149(7) | 83(4)  | 62(4)  | 8(3)  | 45(4) | 47(4) |
| C(33) | 139(6) | 72(4)  | 78(4)  | 15(3) | 52(4) | 21(4) |
| C(34) | 111(5) | 70(4)  | 124(5) | 12(4) | 37(4) | 21(3) |
| C(35) | 105(5) | 151(7) | 124(6) | 4(5)  | 20(5) | 9(5)  |

---

Table S5. Hydrogen coordinates ( $\times 10^4$ ) and isotropic displacement parameters ( $\text{\AA}^2 \times 10^3$ ) for **3b**.

|        | x     | y    | z     | U(eq) |
|--------|-------|------|-------|-------|
| H(1A)  | 7809  | 2580 | 3454  | 82    |
| H(1B)  | 7196  | 2587 | 4525  | 82    |
| H(12)  | 3087  | 3037 | 1049  | 74    |
| H(18)  | 3819  | 5187 | 2448  | 70    |
| H(20)  | -439  | 5439 | 1007  | 85    |
| H(21)  | 4372  | 4256 | -1079 | 68    |
| H(22)  | 2923  | 3743 | -2416 | 75    |
| H(24)  | 872   | 3794 | 1990  | 77    |
| H(25)  | -987  | 4438 | 1200  | 91    |
| H(26)  | 1595  | 2541 | -300  | 81    |
| H(28)  | 905   | 3614 | 4095  | 85    |
| H(31)  | 4486  | 4572 | 5413  | 91    |
| H(32)  | 380   | 4740 | 6558  | 115   |
| H(33)  | 2917  | 5008 | 6616  | 113   |
| H(34A) | 2634  | 6137 | 940   | 150   |
| H(34B) | 2685  | 6232 | 2180  | 150   |
| H(34C) | 1124  | 6315 | 1467  | 150   |
| H(35A) | -1265 | 3599 | 5757  | 189   |
| H(35B) | -1646 | 3922 | 4652  | 189   |
| H(35C) | -1746 | 4288 | 5716  | 189   |





|                                   |                                             |
|-----------------------------------|---------------------------------------------|
| Limiting indices                  | -12<=h<=15, -12<=k<=15, -18<=l<=22          |
| Reflections collected / unique    | 11690 / 5391 [R(int) = 0.0319]              |
| Completeness to theta = 27.45     | 97.0 %                                      |
| Refinement method                 | Full-matrix least-squares on F <sup>2</sup> |
| Data / restraints / parameters    | 5233 / 0 / 308                              |
| Goodness-of-fit on F <sup>2</sup> | 1.034                                       |
| Final R indices [I>2sigma(I)]     | R1 = 0.0514, wR2 = 0.1166                   |
| R indices (all data)              | R1 = 0.0785, wR2 = 0.1299                   |
| Largest diff. peak and hole       | 0.226 and -0.353 e.A <sup>-3</sup>          |

Table S7. Atomic coordinates ( $\times 10^4$ ) and equivalent isotropic displacement parameters ( $\text{\AA}^2 \times 10^3$ ) for **3i**.

U(eq) is defined as one third of the trace of the orthogonalized U<sub>ij</sub> tensor.

|       | x        | y        | z       | U(eq) |
|-------|----------|----------|---------|-------|
| Cl(1) | 4410(1)  | 11169(1) | 1104(1) | 95(1) |
| C(3)  | 9038(1)  | 6153(1)  | 3039(1) | 33(1) |
| C(22) | 7229(2)  | 8751(1)  | 2449(1) | 34(1) |
| C(4)  | 8195(1)  | 6894(1)  | 2572(1) | 33(1) |
| C(16) | 7382(2)  | 6629(1)  | 1744(1) | 35(1) |
| C(10) | 8544(1)  | 4102(1)  | 2892(1) | 35(1) |
| N(1)  | 10501(2) | 7713(1)  | 4890(1) | 60(1) |
| C(2)  | 9787(2)  | 6417(1)  | 3812(1) | 37(1) |
| O(1)  | 9941(1)  | 4954(1)  | 2344(1) | 61(1) |
| C(5)  | 8133(1)  | 7924(1)  | 2901(1) | 33(1) |
| C(9)  | 9216(2)  | 5044(1)  | 2716(1) | 37(1) |
| C(11) | 7711(2)  | 4218(1)  | 3315(1) | 42(1) |
| O(2)  | 5183(2)  | 6215(1)  | -629(1) | 74(1) |
| C(27) | 6336(2)  | 9110(1)  | 2770(1) | 42(1) |
| C(14) | 8169(2)  | 2182(2)  | 2806(1) | 60(1) |
| C(6)  | 8911(2)  | 8194(1)  | 3668(1) | 35(1) |
| N(3)  | 8922(2)  | 10125(1) | 4235(1) | 58(1) |
| C(21) | 6126(2)  | 6666(1)  | 1565(1) | 40(1) |
| C(1)  | 9754(2)  | 7449(1)  | 4149(1) | 39(1) |
| C(23) | 7252(2)  | 9153(2)  | 1712(1) | 44(1) |
| C(8)  | 8899(2)  | 9279(1)  | 3969(1) | 41(1) |
| C(25) | 5508(2)  | 10240(2) | 1629(1) | 53(1) |
| N(2)  | 11334(2) | 5040(2)  | 4669(1) | 70(1) |
| C(26) | 5473(2)  | 9855(2)  | 2356(1) | 50(1) |
| C(7)  | 10644(2) | 5639(2)  | 4281(1) | 46(1) |
| C(20) | 5355(2)  | 6529(2)  | 783(1)  | 47(1) |
| C(15) | 8774(2)  | 3072(1)  | 2641(1) | 49(1) |
| C(13) | 7330(2)  | 2309(2)  | 3214(1) | 58(1) |
| C(17) | 7851(2)  | 6425(2)  | 1114(1) | 51(1) |
| C(19) | 5843(2)  | 6355(2)  | 167(1)  | 51(1) |
| C(12) | 7098(2)  | 3314(2)  | 3470(1) | 54(1) |

|       |         |         |         |       |
|-------|---------|---------|---------|-------|
| C(24) | 6391(2) | 9902(2) | 1297(1) | 55(1) |
| C(18) | 7091(2) | 6294(2) | 338(1)  | 62(1) |
| C(28) | 3923(2) | 6423(2) | -867(2) | 88(1) |

---

Table S8. Bond lengths [Å] and angles [deg] for **3i**.

---

|                |            |
|----------------|------------|
| Cl(1)-C(25)    | 1.746(2)   |
| C(3)-C(2)      | 1.400(2)   |
| C(3)-C(4)      | 1.399(2)   |
| C(3)-C(9)      | 1.515(2)   |
| C(22)-C(23)    | 1.386(2)   |
| C(22)-C(27)    | 1.391(2)   |
| C(22)-C(5)     | 1.498(2)   |
| C(4)-C(5)      | 1.404(2)   |
| C(4)-C(16)     | 1.498(2)   |
| C(16)-C(17)    | 1.390(2)   |
| C(16)-C(21)    | 1.392(2)   |
| C(10)-C(11)    | 1.390(2)   |
| C(10)-C(15)    | 1.394(2)   |
| C(10)-C(9)     | 1.481(2)   |
| N(1)-C(1)      | 1.355(2)   |
| C(2)-C(1)      | 1.406(2)   |
| C(2)-C(7)      | 1.438(2)   |
| O(1)-C(9)      | 1.215(2)   |
| C(5)-C(6)      | 1.404(2)   |
| C(11)-C(12)    | 1.391(3)   |
| O(2)-C(19)     | 1.375(2)   |
| O(2)-C(28)     | 1.413(3)   |
| C(27)-C(26)    | 1.384(3)   |
| C(14)-C(15)    | 1.378(3)   |
| C(14)-C(13)    | 1.380(3)   |
| C(6)-C(1)      | 1.412(2)   |
| C(6)-C(8)      | 1.437(2)   |
| N(3)-C(8)      | 1.137(2)   |
| C(21)-C(20)    | 1.392(2)   |
| C(23)-C(24)    | 1.387(3)   |
| C(25)-C(26)    | 1.366(3)   |
| C(25)-C(24)    | 1.386(3)   |
| N(2)-C(7)      | 1.144(2)   |
| C(20)-C(19)    | 1.376(3)   |
| C(13)-C(12)    | 1.370(3)   |
| C(17)-C(18)    | 1.379(3)   |
| C(19)-C(18)    | 1.384(3)   |
| C(2)-C(3)-C(4) | 121.61(14) |

|                   |            |
|-------------------|------------|
| C(2)-C(3)-C(9)    | 116.92(14) |
| C(4)-C(3)-C(9)    | 121.42(14) |
| C(23)-C(22)-C(27) | 119.29(16) |
| C(23)-C(22)-C(5)  | 121.45(15) |
| C(27)-C(22)-C(5)  | 119.25(15) |
| C(3)-C(4)-C(5)    | 117.75(14) |
| C(3)-C(4)-C(16)   | 122.54(14) |
| C(5)-C(4)-C(16)   | 119.71(14) |
| C(17)-C(16)-C(21) | 117.69(16) |
| C(17)-C(16)-C(4)  | 121.34(15) |
| C(21)-C(16)-C(4)  | 120.76(15) |
| C(11)-C(10)-C(15) | 119.44(17) |
| C(11)-C(10)-C(9)  | 121.68(15) |
| C(15)-C(10)-C(9)  | 118.87(16) |
| C(3)-C(2)-C(1)    | 121.63(15) |
| C(3)-C(2)-C(7)    | 120.51(15) |
| C(1)-C(2)-C(7)    | 117.84(15) |
| C(6)-C(5)-C(4)    | 120.35(15) |
| C(6)-C(5)-C(22)   | 118.69(14) |
| C(4)-C(5)-C(22)   | 120.95(14) |
| O(1)-C(9)-C(10)   | 122.25(15) |
| O(1)-C(9)-C(3)    | 118.50(15) |
| C(10)-C(9)-C(3)   | 119.20(14) |
| C(12)-C(11)-C(10) | 120.00(17) |
| C(19)-O(2)-C(28)  | 118.45(19) |
| C(26)-C(27)-C(22) | 120.47(17) |
| C(15)-C(14)-C(13) | 120.14(18) |
| C(5)-C(6)-C(1)    | 122.42(14) |
| C(5)-C(6)-C(8)    | 119.56(15) |
| C(1)-C(6)-C(8)    | 117.96(15) |
| C(20)-C(21)-C(16) | 121.69(16) |
| N(1)-C(1)-C(2)    | 121.60(16) |
| N(1)-C(1)-C(6)    | 122.20(15) |
| C(2)-C(1)-C(6)    | 116.20(15) |
| C(24)-C(23)-C(22) | 120.35(18) |
| N(3)-C(8)-C(6)    | 177.34(19) |
| C(26)-C(25)-C(24) | 121.37(18) |
| C(26)-C(25)-Cl(1) | 119.38(17) |
| C(24)-C(25)-Cl(1) | 119.25(17) |
| C(25)-C(26)-C(27) | 119.44(18) |
| N(2)-C(7)-C(2)    | 178.2(2)   |
| C(19)-C(20)-C(21) | 119.43(18) |
| C(14)-C(15)-C(10) | 119.92(19) |
| C(12)-C(13)-C(14) | 120.69(19) |

|                   |            |
|-------------------|------------|
| C(18)-C(17)-C(16) | 120.76(18) |
| O(2)-C(19)-C(20)  | 125.08(19) |
| O(2)-C(19)-C(18)  | 115.36(18) |
| C(20)-C(19)-C(18) | 119.55(17) |
| C(13)-C(12)-C(11) | 119.8(2)   |
| C(23)-C(24)-C(25) | 119.09(19) |
| C(17)-C(18)-C(19) | 120.84(18) |

---

Symmetry transformations used to generate equivalent atoms:

Table S9. Anisotropic displacement parameters ( $\text{Å}^2 \times 10^3$ ) for **3i**.

The anisotropic displacement factor exponent takes the form:

$$-2 \pi^2 [ h^2 a^{*2} U_{11} + \dots + 2 h k a^* b^* U_{12} ]$$

|       | U11   | U22   | U33    | U23    | U13    | U12   |
|-------|-------|-------|--------|--------|--------|-------|
| Cl(1) | 64(1) | 75(1) | 136(1) | 50(1)  | 15(1)  | 22(1) |
| C(3)  | 37(1) | 29(1) | 36(1)  | -4(1)  | 14(1)  | -3(1) |
| C(22) | 39(1) | 26(1) | 35(1)  | -4(1)  | 8(1)   | -3(1) |
| C(4)  | 36(1) | 30(1) | 33(1)  | -3(1)  | 12(1)  | -4(1) |
| C(16) | 41(1) | 29(1) | 34(1)  | -5(1)  | 11(1)  | -2(1) |
| C(10) | 34(1) | 30(1) | 35(1)  | -4(1)  | 3(1)   | 3(1)  |
| N(1)  | 75(1) | 41(1) | 45(1)  | -13(1) | -10(1) | 10(1) |
| C(2)  | 41(1) | 31(1) | 36(1)  | -3(1)  | 9(1)   | 1(1)  |
| O(1)  | 72(1) | 48(1) | 82(1)  | -12(1) | 49(1)  | -1(1) |
| C(5)  | 38(1) | 29(1) | 33(1)  | 0(1)   | 13(1)  | -3(1) |
| C(9)  | 39(1) | 34(1) | 36(1)  | -6(1)  | 10(1)  | 3(1)  |
| C(11) | 43(1) | 34(1) | 49(1)  | -3(1)  | 12(1)  | 4(1)  |
| O(2)  | 85(1) | 80(1) | 39(1)  | -9(1)  | -6(1)  | -1(1) |
| C(27) | 48(1) | 37(1) | 40(1)  | -6(1)  | 12(1)  | 1(1)  |
| C(14) | 71(1) | 28(1) | 73(1)  | -9(1)  | 12(1)  | 2(1)  |
| C(6)  | 42(1) | 28(1) | 35(1)  | -4(1)  | 11(1)  | -3(1) |
| N(3)  | 74(1) | 35(1) | 51(1)  | -10(1) | 0(1)   | 2(1)  |
| C(21) | 45(1) | 36(1) | 40(1)  | -5(1)  | 15(1)  | -6(1) |
| C(1)  | 44(1) | 35(1) | 35(1)  | -5(1)  | 8(1)   | -3(1) |
| C(23) | 46(1) | 40(1) | 47(1)  | 4(1)   | 15(1)  | -3(1) |
| C(8)  | 48(1) | 34(1) | 37(1)  | -3(1)  | 6(1)   | -1(1) |
| C(25) | 42(1) | 35(1) | 73(1)  | 8(1)   | 5(1)   | -1(1) |
| N(2)  | 78(1) | 70(1) | 55(1)  | 1(1)   | 10(1)  | 31(1) |
| C(26) | 44(1) | 39(1) | 64(1)  | -6(1)  | 14(1)  | 3(1)  |
| C(7)  | 52(1) | 44(1) | 39(1)  | -7(1)  | 8(1)   | 7(1)  |
| C(20) | 42(1) | 43(1) | 49(1)  | -5(1)  | 5(1)   | -5(1) |
| C(15) | 53(1) | 36(1) | 58(1)  | -11(1) | 16(1)  | 5(1)  |
| C(13) | 54(1) | 38(1) | 73(1)  | 6(1)   | 8(1)   | -8(1) |
| C(17) | 47(1) | 65(1) | 43(1)  | -9(1)  | 16(1)  | 2(1)  |
| C(19) | 66(1) | 45(1) | 33(1)  | -6(1)  | 2(1)   | -3(1) |

|       |       |       |       |        |        |       |
|-------|-------|-------|-------|--------|--------|-------|
| C(12) | 47(1) | 47(1) | 68(1) | 6(1)   | 19(1)  | -2(1) |
| C(24) | 58(1) | 47(1) | 54(1) | 16(1)  | 10(1)  | -5(1) |
| C(18) | 66(1) | 85(2) | 37(1) | -13(1) | 20(1)  | 3(1)  |
| C(28) | 81(2) | 88(2) | 64(2) | 2(1)   | -23(1) | -7(1) |

---



Table S10. Hydrogen coordinates ( $\times 10^4$ ) and isotropic displacement parameters ( $\text{\AA}^2 \times 10^3$ ) for **3i**.

|        | x     | y     | z     | U(eq) |
|--------|-------|-------|-------|-------|
| H(1A)  | 11011 | 7243  | 5166  | 72    |
| H(1B)  | 10464 | 8349  | 5084  | 72    |
| H(11)  | 7563  | 4900  | 3494  | 51    |
| H(27)  | 6317  | 8847  | 3265  | 50    |
| H(14)  | 8326  | 1494  | 2641  | 71    |
| H(21)  | 5792  | 6786  | 1979  | 47    |
| H(23)  | 7848  | 8919  | 1494  | 53    |
| H(26)  | 4875  | 10092 | 2571  | 59    |
| H(20)  | 4518  | 6556  | 677   | 56    |
| H(15)  | 9336  | 2986  | 2363  | 59    |
| H(13)  | 6917  | 1705  | 3317  | 69    |
| H(17)  | 8687  | 6376  | 1218  | 61    |
| H(12)  | 6532  | 3391  | 3746  | 65    |
| H(24)  | 6405  | 10173 | 803   | 66    |
| H(18)  | 7421  | 6163  | -77   | 74    |
| H(28A) | 3536  | 5914  | -608  | 131   |
| H(28B) | 3592  | 6347  | -1441 | 131   |
| H(28C) | 3783  | 7148  | -714  | 131   |
